# Supplementary material for: The osmotic framework adsorbed solution theory: predicting mixture coadsorption in flexible nanoporous materials
Source: Royal Society of Chemistry journal article supplement (doi:10.1039/c003434g), 2010-01-01
Supplement: c003434g.pdf [file c003434g.pdf]

## Supplementary Information for:

# The Osmotic Framework Adsorbed Solution Theory: Predicting Mixture Coadsorption in Flexible Nanoporous Materials

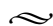

François-Xavier Coudert

## A. Resolution of the IAST equations in the low-pressure limit

The main IAST equation describing the coadsorption of two fluids for which pure-component adsorption follows Langmuir isotherms is Eq. 17. Although it is analytical, its solution has no expression in closed form. In the low-pressure limit, however, it is possible to obtain an analytical solution to this equation as a power series in  $P$ . We derive here the expressions of the selectivity,  $\alpha$ , and the total quantity of adsorbed fluids,  $N_{\text{tot}}$ , in the low-pressure limit to the second order in  $P$ .

Eq. 17 can be rewritten in a more symmetric form:

$$N_B \ln \left( 1 + \frac{K_B}{N_B} \times P_B^* \right) = N_C \ln \left( 1 + \frac{K_C}{N_C} \times \frac{P(1 - y_B)P_B^*}{P_B^* - P y_B} \right) \quad (\text{S1})$$

We develop  $P_B^*$  as a power series in  $P$ ,  $P_B^* = \sum_i a_i P^i$ . Substituting this series in Eq. S1 and developping the logarithms to the second power in  $P$  yields the following values for the  $a_i$ 's:

$$\begin{cases} a_0 = 0 \\ a_1 = \frac{K_C y_C + K_B y_B}{K_B} \\ a_2 = -\frac{K_C y_C (N_B - N_C) (K_C y_C + K_B y_B)}{2 K_B N_B N_C} \end{cases} \quad (\text{S2})$$

From there, we can express the molar fraction of B,  $x_B = P y_B / P_B^*$ , the fraction of C,  $x_C = 1 - x_B$ , the selectivity,  $\alpha = (x_B / x_C) / (y_B / y_C)$ , and the total adsorbed quantity,  $N_{\text{tot}}^{-1} = x_B / N_B^*(P_B^*) + x_C / N_C^*(P_C^*)$ . Of particular interest are the expression of the selectivity:

$$\alpha(P) = \frac{K_B}{K_C} + \frac{K_B}{K_C} \times \frac{(N_B - N_C)(K_C y_C + K_B y_B)}{2 N_B N_C} P + O(P^2) \quad (\text{S3})$$

and that of  $N_{\text{tot}}$ :

$$N_{\text{tot}}(P) = (K_C y_C + K_B y_B) P - \frac{(K_C y_C + K_B y_B)(K_B N_C y_B + K_C N_B y_C)}{N_B N_C} P^2 + O(P^3) \quad (\text{S4})$$

## B. High-pressure asymptotic expressions of the IAST solutions

In this section, we propose asymptotic expressions for the IAST selectivity  $\alpha$  and total adsorbed quantity of fluid  $N_{\text{tot}}$  in the high-pressure limit. To do so, we will first find an asymptotic expression for  $P_B^*$  from Eq. S1:

$$N_B \ln \left( 1 + \frac{K_B}{N_B} \times P_B^* \right) = N_C \ln \left( 1 + \frac{K_C}{N_C} \times \frac{P(1 - y_B)P_B^*}{P_B^* - P y_B} \right) \quad (\text{S1})$$

The solution  $P_B^*$  lies in the range  $P y_B < P_B^* < \infty$ , and therefore goes to infinity when  $P$  does. We rewrite Eq. S1 by setting  $P_B^* = \omega P y_B$  (where  $\omega > 1$ ):

$$N_B \ln \left( 1 + \frac{K_B y_B}{N_B} \times P \omega \right) = N_C \ln \left( 1 + \frac{K_C y_C}{N_C} \times P \frac{\omega}{\omega - 1} \right) \quad (\text{S5})$$

To make things easier, we set  $\Xi = K_C y_C / N_C$ ,  $\Psi = K_B y_B / N_B$  and  $\lambda = N_B / N_C$ . Eq. S5 can then be written as:

$$\Xi P \frac{\omega}{\omega - 1} = (1 + \Psi P \omega)^\lambda - 1 \quad (\text{S6})$$

Assuming that  $\lambda > 1$  (i.e.  $N_B > N_C$ ; otherwise, the role of B and C are permuted), the first two terms in the asymptotic expansion in  $P$  of the solution are:

$$\omega(P) = 1 + \frac{\Xi}{\Psi^\lambda} \times \frac{1}{P^{\lambda-1}} + O\left(\frac{1}{P^\lambda}\right) \quad (\text{S7})$$

which gives the following expression for  $P_B^*$ :

$$P_B^*(P) = P y_B + P^{2 - \frac{N_B}{N_C}} y_B \left( \frac{K_C y_C}{N_C} \right) \left( \frac{K_B y_B}{N_B} \right)^{-\frac{N_B}{N_C}} + O\left(P^{1 - \frac{N_B}{N_C}}\right) \quad (\text{S8})$$

Using the other IAST equations, we can calculate from this expression of  $P_B^*$  all other quantities, including the selectivity:

$$\alpha \sim (P y_B)^{\frac{N_B}{N_C} - 1} \left( \frac{N_C}{K_C} \right) \left( \frac{K_B}{N_B} \right)^{\frac{N_B}{N_C}} \quad (\text{S9})$$

and the total adsorbed quantity of fluid:

$$N_{\text{tot}} = N_B - N_B \left( \frac{K_C y_C}{N_C} \right) \left( \frac{K_B y_B}{N_B} \right)^{-\frac{N_B}{N_C}} \left( 1 + \frac{N_B}{N_C} \right) P^{1 - \frac{N_B}{N_C}} + O\left(P^{-\frac{N_B}{N_C}}\right) \quad (\text{S10})$$

## C. Analytical expression of the gate-opening pressure

We establish an approximate analytical expression for the gate-opening pressure upon adsorption of a mixture of fluids, as a function of the composition of the mixture, relating it to the gate-opening pressures for its individual components. This requires the knowledge of an approximate expression for  $N_{\text{tot}}(P, \mathbf{y})$ , the total quantity of adsorbed fluid in the open structure. The most straightforward way to proceed is to use the second-order power series of  $N_{\text{tot}}(P)$  derived above (Eq. S4). However, the domain of validity of this approximation is usually rather small,<sup>†</sup>. Moreover, the analytic calculation is thus rather convoluted. To avoid both these issues, and because the total adsorption isotherms  $N_{\text{tot}}(P)$  for the mixture as a function of pressure clearly look like Langmuir isotherms, we use a Langmuir equation to describe them:

$$N_{\text{tot}}(P, \mathbf{y}) = \frac{K(\mathbf{y})P}{1 + \frac{K(\mathbf{y})P}{N(\mathbf{y})}} \quad (\text{S11})$$

<sup>†</sup>The domain of validity of the second-order approximation is smaller than the radius of convergence of the power series itself, which corresponds to  $P = \min_i (N_i / K_i)$ , where index  $i$  runs over all the components of the mixture.

with parameters  $K(\mathbf{y})$  and  $N(\mathbf{y})$  that depend on the mixture composition and are adjusted to reproduce the second-order low-pressure behavior of Eq. S4. This yields:

$$\begin{cases} K(\mathbf{y}) = K_B y_B + K_C y_C \\ N(\mathbf{y}) = \frac{K_C y_C + K_B y_B}{\frac{K_C y_C}{N_C} + \frac{K_B y_B}{N_B}} \end{cases} \quad (\text{S12})$$

With this approximate form for  $N_{\text{tot}}$ , we can establish the value of the gate-opening pressure upon adsorption of the mixture. The difference in osmotic potential between the close phase and the open phase of the material is:

$$\begin{aligned} \Delta\Omega_{\text{os}} &= \Delta F_{\text{host}} - RT \int_0^P \frac{N_{\text{tot}}(p)}{p} dp \\ &= \Delta F_{\text{host}} - N(\mathbf{y}) RT \ln \left( 1 + \frac{K(\mathbf{y})P}{N(\mathbf{y})} \right) \end{aligned} \quad (\text{S13})$$

The gate-opening pressure  $P_{\text{gate}}$  is such that  $\Delta\Omega_{\text{os}}(P_{\text{gate}}) = 0$ , which means that

$$P_{\text{gate}}(\mathbf{y}) = \frac{N(\mathbf{y})}{K(\mathbf{y})} \left[ \exp \left( \frac{\Delta F_{\text{host}}}{N(\mathbf{y})RT} \right) - 1 \right] \quad (\text{S14})$$

In the approximation we use here, where the gate-opening happens before the plateau of the isotherm is reached, we have  $\Delta F \ll N_i RT$  and thus, the gate-opening pressure is

$$P_{\text{gate}}(\mathbf{y}) \simeq \frac{\Delta F_{\text{host}}}{K(\mathbf{y})RT} \quad (\text{S15})$$

By substituting the expression of  $K(\mathbf{y})$  from Eq. S12 and identifying the gate-opening pressures for the adsorption of the pure components B and C, we get the analytical expression:

$$\frac{1}{P_{\text{gate}}(\mathbf{y})} = \frac{y_B}{P_{\text{gate},B}} + \frac{y_C}{P_{\text{gate},C}} \quad (\text{S16})$$

Finally, it can be demonstrated straightforwardly but quite tediously that this approximate expression is also valid for mixtures involving more than two components:

$$\frac{1}{P_{\text{gate}}(\mathbf{y})} = \sum_i \frac{y_i}{P_{\text{gate},i}} \quad (\text{S17})$$
